# Supplementary material for: Chromatographic Determination of the Mycotoxin Patulin in 219 Chinese Tea Samples and Implications for Human Health
Source: MDPI journal article supplement (doi:10.3390/molecules27092852), 2022-04-29
Supplement: s1 [file s1]

## **Supporting information**

### **Chromatographic determination of the mycotoxin patulin in 219 Chinese tea samples and implications for human health**

**Hai Li <sup>1,a</sup>, Candi Liu <sup>1,a</sup>, Shurong Luo <sup>1</sup>, Sijie Zhu <sup>1</sup>, Shan Tang <sup>1</sup>, Huimei Zeng <sup>1</sup>, Yu Qing <sup>1</sup>, Ming Ma <sup>1</sup>, Dong Zeng <sup>2,\*</sup>, Teris A. van Beek <sup>4,\*</sup>, Hui Wang <sup>3</sup>, Bo Chen <sup>1,\*</sup>**

<sup>1</sup>Key Laboratory of Phytochemical R&D of Hunan Province and Key Laboratory of Chemical Biology & Traditional Chinese Medicine Research of Ministry of Education, Hunan Normal University, Changsha, 410081, China

<sup>2</sup>Hunan Provincial Center for Disease Control and Prevention, Changsha 410005, China

<sup>3</sup>Laboratory of Organic Chemistry, Wageningen University, Stippeneng 4, 6708 WE Wageningen, The Netherlands

<sup>4</sup>Changsha Institute for Food and Drug Control& National quality supervision and inspection center of liquor products (Hunan), Changsha 410013, China

**Table S1**

The detail information of 219 tea samples, including sample name, fermentation degree, started year of aging, region, place of origin and concentration of patulin.

| No. | Sample name | Fermentation degree                         | Started year of aging | Region             | Place of origin | Content ( $\mu\text{g /kg}$ ) |
|-----|-------------|---------------------------------------------|-----------------------|--------------------|-----------------|-------------------------------|
| 1   | Black tea   | Completely fermented<br>(Jingmaohou)        | 2019                  | Central<br>China   | Hunan           | < LOD                         |
| 2   | Black tea   | Completely fermented<br>(Jingjunmei)        | 2017                  | East China         | Fujian          | 43.36                         |
| 3   | Black tea   | Completely fermented                        | 2021                  | East China         | Fujian          | < LOD                         |
| 4   | Black tea   | Completely fermented                        | 2018                  | East China         | Fujian          | 68.49                         |
| 5   | Black tea   | Completely fermented<br>(Wushangoncha)      | 2019                  | Central<br>China   | Hunan           | < LOD                         |
| 6   | Black tea   | Completely fermented                        | 2016                  | East China         | Fujian          | 11.23                         |
| 7   | Black tea   | Completely fermented<br>(Zhenshanxiaozhong) | 2017                  | East China         | Fujian          | 39.59                         |
| 8   | Black tea   | Completely fermented                        | 2016                  | Central<br>China   | Hunan           | 7.28                          |
| 9   | Black tea   | Completely fermented                        | 2017                  | East China         | Fujian          | 6.43                          |
| 10  | Black tea   | Completely fermented                        | 2018                  | East China         | Fujian          | 6.30                          |
| 11  | Black tea   | Completely fermented                        | 2017                  | Central<br>China   | Hunan           | 6.23                          |
| 12  | Black tea   | Completely fermented                        | 2019                  | Southwest<br>China | Yunnan          | 5.79                          |
| 13  | Black tea   | Completely fermented                        | 2018                  | Central<br>China   | Hunan           | 5.71                          |
| 14  | Black tea   | Completely fermented                        | 2012                  | Southwest<br>China | Yunnan          | 4.66                          |
| 15  | Black tea   | Completely fermented                        | 2019                  | Central<br>China   | Hunan           | 4.45                          |
| 16  | Black tea   | Completely fermented                        | 2018                  | East China         | Fujian          | 3.89                          |
| 17  | Black tea   | Completely fermented                        | 2018                  | Abroad             | India           | 3.75                          |
| 18  | Black tea   | Completely fermented                        | 2018                  | East China         | Fujian          | 3.57                          |
| 19  | Black tea   | Completely fermented                        | 2019                  | Central<br>China   | Hunan           | 3.11                          |
| 20  | Black tea   | Completely fermented                        | 2018                  | Central<br>China   | Hunan           | 2.96                          |
| 21  | Black tea   | Completely fermented                        | 2018                  | East China         | Fujian          | 2.90                          |

|    |           |                           |      |                    |         |       |
|----|-----------|---------------------------|------|--------------------|---------|-------|
| 22 | Black tea | Completely fermented      | 2018 | East China         | Fujian  | 2.23  |
| 23 | Black tea | Completely fermented      | 2019 | East China         | Fujian  | < LOD |
| 24 | Black tea | Completely fermented      | 2018 | East China         | Fujian  | < LOD |
| 25 | Black tea | Completely fermented      | 2018 | East China         | Fujian  | < LOD |
| 26 | Black tea | Completely fermented      | 2018 | North<br>China     | Beijing | < LOD |
| 27 | Black tea | Completely fermented      | 2018 | Abroad             | India   | < LOD |
| 28 | Black tea | Completely fermented      | 2018 | East China         | Fujian  | < LOD |
| 29 | Black tea | Completely fermented      | 2017 | East China         | Fujian  | < LOD |
| 30 | Black tea | Completely fermented      | 2017 | Abroad             | India   | < LOD |
| 31 | Black tea | Completely fermented      | 2017 | Central<br>China   | Hunan   | < LOD |
| 32 | Black tea | Completely fermented      | 2019 | East China         | Fujian  | < LOD |
| 33 | Black tea | Completely fermented      | 2018 | Southwest<br>China | Yunnan  | < LOD |
| 34 | Black tea | Completely fermented      | 2018 | East China         | Fujian  | < LOD |
| 35 | Black tea | Completely fermented      | 2017 | East China         | Fujian  | < LOD |
| 36 | Green tea | Non-fermented<br>(YYS006) | 2021 | Central<br>China   | Hunan   | < LOD |
| 37 | Green tea | Non-fermented             | 2018 | Central<br>China   | Hunan   | 13.84 |
| 38 | Green tea | Non-fermented<br>(YYS008) | 2021 | Central<br>China   | Hunan   | 22.84 |
| 39 | Green tea | Non-fermented             | 2021 | Central<br>China   | Hunan   | 9.57  |
| 40 | Green tea | Non-fermented             | 2018 | East China         | Jiangsu | 6.99  |
| 41 | Green tea | Non-fermented             | 2018 | Southwest<br>China | Sichuan | 5.67  |
| 42 | Green tea | Non-fermented             | 2021 | Central<br>China   | Hunan   | 5.31  |
| 43 | Green tea | Non-fermented             | 2018 | Central<br>China   | Hunan   | 5.28  |
| 44 | Green tea | Non-fermented             | 2018 | Central<br>China   | Hunan   | 5.24  |
| 45 | Green tea | Non-fermented             | 2020 | Central<br>China   | Hunan   | 5.08  |
| 46 | Green tea | Non-fermented             | 2021 | Central<br>China   | Hunan   | 4.11  |

|    |           |               |      |                    |          |       |
|----|-----------|---------------|------|--------------------|----------|-------|
| 47 | Green tea | Non-fermented | 2021 | Central<br>China   | Hunan    | 4.10  |
| 48 | Green tea | Non-fermented | 2018 | Central<br>China   | Hunan    | 4.03  |
| 49 | Green tea | Non-fermented | 2018 | Central<br>China   | Hunan    | 3.95  |
| 50 | Green tea | Non-fermented | 2018 | Central<br>China   | Hunan    | 3.49  |
| 51 | Green tea | Non-fermented | 2021 | Central<br>China   | Hunan    | 2.89  |
| 52 | Green tea | Non-fermented | 2018 | Central<br>China   | Hunan    | 2.70  |
| 53 | Green tea | Non-fermented | 2018 | Central<br>China   | Hunan    | 2.62  |
| 54 | Green tea | Non-fermented | 2018 | Central<br>China   | Hunan    | 2.43  |
| 55 | Green tea | Non-fermented | 2015 | East China         | Fujian   | 2.09  |
| 56 | Green tea | Non-fermented | 2017 | Central<br>China   | Hunan    | 1.97  |
| 57 | Green tea | Non-fermented | 2017 | Central<br>China   | Hunan    | < LOD |
| 58 | Green tea | Non-fermented | 2018 | Central<br>China   | Hunan    | < LOD |
| 59 | Green tea | Non-fermented | 2021 | Central<br>China   | Hunan    | < LOD |
| 60 | Green tea | Non-fermented | 2021 | Central<br>China   | Hunan    | < LOD |
| 61 | Green tea | Non-fermented | 2021 | Central<br>China   | Hunan    | < LOD |
| 62 | Green tea | Non-fermented | 2021 | Central<br>China   | Hunan    | < LOD |
| 63 | Green tea | Non-fermented | 2021 | Central<br>China   | Hunan    | < LOD |
| 64 | Green tea | Non-fermented | 2021 | Central<br>China   | Hunan    | < LOD |
| 65 | Green tea | Non-fermented | 2021 | East China         | Zhejiang | < LOD |
| 66 | Green tea | Non-fermented | 2021 | Central<br>China   | Hunan    | < LOD |
| 67 | Green tea | Non-fermented | 2021 | Southwest<br>China | Sichuan  | < LOD |
| 68 | Green tea | Non-fermented | 2021 | East China         | Zhejiang | < LOD |
| 69 | Green tea | Non-fermented | 2021 | East China         | Zhejiang | < LOD |

|    |           |               |      |                    |           |       |
|----|-----------|---------------|------|--------------------|-----------|-------|
| 70 | Green tea | Non-fermented | 2021 | Southwest<br>China | Sichuan   | < LOD |
| 71 | Green tea | Non-fermented | 2021 | Central<br>China   | Hunan     | < LOD |
| 72 | Green tea | Non-fermented | 2021 | Central<br>China   | Hunan     | < LOD |
| 73 | Green tea | Non-fermented | 2021 | Central<br>China   | Henan     | < LOD |
| 74 | Green tea | Non-fermented | 2021 | Central<br>China   | Hunan     | < LOD |
| 75 | Green tea | Non-fermented | 2021 | South<br>China     | Guangxi   | < LOD |
| 76 | Green tea | Non-fermented | 2021 | Southwest<br>China | Guizhou   | < LOD |
| 77 | Green tea | Non-fermented | 2020 | East China         | Jiangsu   | < LOD |
| 78 | Green tea | Non-fermented | 2019 | South<br>China     | Guangdong | < LOD |
| 79 | Green tea | Non-fermented | 2019 | Central<br>China   | Hunan     | < LOD |
| 80 | Green tea | Non-fermented | 2019 | Central<br>China   | Hunan     | < LOD |
| 81 | Green tea | Non-fermented | 2019 | Central<br>China   | Hunan     | < LOD |
| 82 | Green tea | Non-fermented | 2019 | Central<br>China   | Hunan     | < LOD |
| 83 | Green tea | Non-fermented | 2019 | Central<br>China   | Hunan     | < LOD |
| 84 | Green tea | Non-fermented | 2019 | Central<br>China   | Hunan     | < LOD |
| 85 | Green tea | Non-fermented | 2018 | East China         | Jiangsu   | < LOD |
| 86 | Green tea | Non-fermented | 2018 | Central<br>China   | Hunan     | < LOD |
| 87 | Green tea | Non-fermented | 2018 | Central<br>China   | Hunan     | < LOD |
| 88 | Green tea | Non-fermented | 2018 | Central<br>China   | Hunan     | < LOD |
| 89 | Green tea | Non-fermented | 2018 | Southwest<br>China | Sichuan   | < LOD |
| 90 | Green tea | Non-fermented | 2018 | Central<br>China   | Hunan     | < LOD |
| 91 | Green tea | Non-fermented | 2018 | Central<br>China   | Hunan     | < LOD |
| 92 | Green tea | Non-fermented | 2018 | East China         | Shandong  | < LOD |

|     |           |               |      |                  |         |       |
|-----|-----------|---------------|------|------------------|---------|-------|
| 93  | Green tea | Non-fermented | 2018 | Central<br>China | Hunan   | < LOD |
| 94  | Green tea | Non-fermented | 2018 | Central<br>China | Hunan   | < LOD |
| 95  | Green tea | Non-fermented | 2018 | East China       | Fujian  | < LOD |
| 96  | Green tea | Non-fermented | 2018 | Central<br>China | Hunan   | < LOD |
| 97  | Green tea | Non-fermented | 2018 | Central<br>China | Hunan   | < LOD |
| 98  | Green tea | Non-fermented | 2018 | Central<br>China | Hunan   | < LOD |
| 99  | Green tea | Non-fermented | 2018 | Central<br>China | Hunan   | < LOD |
| 100 | Green tea | Non-fermented | 2018 | Central<br>China | Hunan   | < LOD |
| 101 | Green tea | Non-fermented | 2018 | Central<br>China | Hunan   | < LOD |
| 102 | Green tea | Non-fermented | 2018 | Central<br>China | Hunan   | < LOD |
| 103 | Green tea | Non-fermented | 2018 | Central<br>China | Hunan   | < LOD |
| 104 | Green tea | Non-fermented | 2018 | Central<br>China | Hunan   | < LOD |
| 105 | Green tea | Non-fermented | 2017 | Central<br>China | Hunan   | < LOD |
| 106 | Green tea | Non-fermented | 2020 | South<br>China   | Guangxi | < LOD |
| 107 | Green tea | Non-fermented | 2019 | Central<br>China | Hunan   | < LOD |
| 108 | Green tea | Non-fermented | 2019 | Central<br>China | Hunan   | < LOD |
| 109 | Green tea | Non-fermented | 2019 | Central<br>China | Hunan   | < LOD |
| 110 | Green tea | Non-fermented | 2019 | Central<br>China | Hunan   | < LOD |
| 111 | Green tea | Non-fermented | 2019 | Central<br>China | Hunan   | < LOD |
| 112 | Green tea | Non-fermented | 2018 | Central<br>China | Hunan   | < LOD |
| 113 | Green tea | Non-fermented | 2018 | Central<br>China | Hunan   | < LOD |
| 114 | Green tea | Non-fermented | 2018 | Central<br>China | Hunan   | < LOD |

|     |            |                     |      |                    |          |       |
|-----|------------|---------------------|------|--------------------|----------|-------|
| 115 | Green tea  | Non-fermented       | 2018 | Southwest<br>China | Guizhou  | < LOD |
| 116 | Green tea  | Non-fermented       | 2018 | Central<br>China   | Hunan    | < LOD |
| 117 | Green tea  | Non-fermented       | 2018 | Central<br>China   | Hunan    | < LOD |
| 118 | Green tea  | Non-fermented       | 2018 | Central<br>China   | Hunan    | < LOD |
| 119 | Green tea  | Non-fermented       | 2018 | Central<br>China   | Hunan    | < LOD |
| 120 | Green tea  | Non-fermented       | 2018 | Central<br>China   | Hunan    | < LOD |
| 121 | Green tea  | Non-fermented       | 2018 | East China         | Fujian   | < LOD |
| 122 | Green tea  | Non-fermented       | 2017 | East China         | Zhejiang | < LOD |
| 123 | Green tea  | Non-fermented       | 2017 | Central<br>China   | Hunan    | < LOD |
| 124 | Oolong tea | Partially fermented | 2018 | East China         | Fujian   | < LOD |
| 125 | Oolong tea | Partially fermented | 2018 | East China         | Fujian   | 21.43 |
| 126 | Oolong tea | Partially fermented | 2019 | East China         | Zhejiang | < LOD |
| 127 | White tea  | Partially fermented | 2010 | East China         | Fujian   | 10.92 |
| 128 | White tea  | Partially fermented | 2006 | East China         | Fujian   | 7.62  |
| 129 | White tea  | Partially fermented | 2018 | Central<br>China   | Hunan    | 6.72  |
| 130 | Oolong tea | Partially fermented | 2018 | East China         | Fujian   | 6.50  |
| 131 | White tea  | Partially fermented | 2017 | East China         | Fujian   | 5.90  |
| 132 | White tea  | Partially fermented | 2016 | East China         | Fujian   | 5.08  |
| 133 | White tea  | Partially fermented | 2015 | East China         | Fujian   | 4.30  |
| 134 | Oolong tea | Partially fermented | 2018 | East China         | Fujian   | 3.60  |
| 135 | Yellow tea | Partially fermented | 2018 | East China         | Anhui    | 2.88  |
| 136 | White tea  | Partially fermented | 2018 | East China         | Zhejiang | 2.41  |
| 137 | White tea  | Partially fermented | 2018 | Central<br>China   | Hunan    | < LOD |
| 138 | Oolong tea | Partially fermented | 2019 | East China         | Fujian   | < LOD |
| 139 | White tea  | Partially fermented | 2019 | East China         | Fujian   | < LOD |
| 140 | Oolong tea | Partially fermented | 2018 | East China         | Jiangxi  | < LOD |

|     |            |                            |      |                  |           |       |
|-----|------------|----------------------------|------|------------------|-----------|-------|
| 141 | Oolong tea | Partially fermented        | 2018 | East China       | Fujian    | < LOD |
| 142 | White tea  | Partially fermented        | 2018 | East China       | Fujian    | < LOD |
| 143 | Yellow tea | Partially fermented        | 2018 | East China       | Anhui     | < LOD |
| 144 | Oolong tea | Partially fermented        | 2018 | East China       | Zhejiang  | < LOD |
| 145 | Oolong tea | Partially fermented        | 2018 | East China       | Jiangsu   | < LOD |
| 146 | Oolong tea | Partially fermented        | 2018 | East China       | Fujian    | < LOD |
| 147 | Yellow tea | Partially fermented        | 2018 | East China       | Anhui     | < LOD |
| 148 | Oolong tea | Partially fermented        | 2018 | Central<br>China | Hunan     | < LOD |
| 149 | Yellow tea | Partially fermented        | 2018 | East China       | Anhui     | < LOD |
| 150 | White tea  | Partially fermented        | 2018 | East China       | Zhejiang  | < LOD |
| 151 | Yellow tea | Partially fermented        | 2018 | East China       | Anhui     | < LOD |
| 152 | White tea  | Partially fermented        | 2018 | East China       | Fujian    | < LOD |
| 153 | Yellow tea | Partially fermented        | 2017 | East China       | Anhui     | < LOD |
| 154 | Oolong tea | Partially fermented        | 2017 | Central<br>China | Hunan     | < LOD |
| 155 | Oolong tea | Partially fermented        | 2020 | East China       | Taiwan    | < LOD |
| 156 | Oolong tea | Partially fermented        | 2020 | East China       | Fujian    | < LOD |
| 157 | Oolong tea | Partially fermented        | 2019 | East China       | Fujian    | < LOD |
| 158 | Oolong tea | Partially fermented        | 2018 | East China       | Fujian    | < LOD |
| 159 | Oolong tea | Partially fermented        | 2018 | East China       | Fujian    | < LOD |
| 160 | Yellow tea | Partially fermented        | 2018 | Central<br>China | Hubei     | < LOD |
| 161 | Oolong tea | Partially fermented        | 2018 | East China       | Fujian    | < LOD |
| 162 | Oolong tea | Partially fermented        | 2018 | South<br>China   | Guangdong | < LOD |
| 163 | White tea  | Partially fermented        | 2018 | East China       | Fujian    | < LOD |
| 164 | Oolong tea | Partially fermented        | 2018 | East China       | Taiwan    | < LOD |
| 165 | Dark tea   | Post-fermented<br>(YYS024) | 2021 | Central<br>China | Hunan     | 26.55 |
| 166 | Dark tea   | Post-fermented<br>(YYS025) | 2021 | Central<br>China | Hunan     | 123.6 |
| 167 | Dark tea   | Post-fermented             | 2012 | Central<br>China | Hunan     | < LOD |



|     |            |                |      |                    |        |       |
|-----|------------|----------------|------|--------------------|--------|-------|
| 168 | Pu-erh tea | Post-fermented | 1990 | Southwest<br>China | Yunnan | 6.68  |
| 169 | Dark tea   | Post-fermented | 2007 | Central<br>China   | Hunan  | 6.23  |
| 170 | Dark tea   | Post-fermented | 2021 | Central<br>China   | Hunan  | 6.21  |
| 171 | Dark tea   | Post-fermented | 2016 | Central<br>China   | Hunan  | 5.72  |
| 172 | Pu-erh tea | Post-fermented | 2016 | Southwest<br>China | Yunnan | 5.42  |
| 173 | Pu-erh tea | Post-fermented | 2018 | Southwest<br>China | Yunnan | 4.18  |
| 174 | Dark tea   | Post-fermented | 2021 | Central<br>China   | Hunan  | 4.14  |
| 175 | Pu-erh tea | Post-fermented | 2014 | Southwest<br>China | Yunnan | 3.58  |
| 176 | Dark tea   | Post-fermented | 2018 | Central<br>China   | Hunan  | 2.44  |
| 177 | Dark tea   | Post-fermented | 2018 | Central<br>China   | Hunan  | < LOD |
| 178 | Pu-erh tea | Post-fermented | 2016 | Southwest<br>China | Yunnan | < LOD |
| 179 | Dark tea   | Post-fermented | 2021 | Central<br>China   | Hunan  | < LOD |
| 180 | Dark tea   | Post-fermented | 2021 | Central<br>China   | Hunan  | < LOD |
| 181 | Dark tea   | Post-fermented | 2021 | Central<br>China   | Hunan  | < LOD |
| 182 | Dark tea   | Post-fermented | 2021 | Central<br>China   | Hunan  | < LOD |
| 183 | Dark tea   | Post-fermented | 2021 | Central<br>China   | Hunan  | < LOD |
| 184 | Dark tea   | Post-fermented | 2021 | Central<br>China   | Hunan  | < LOD |
| 185 | Dark tea   | Post-fermented | 2021 | Central<br>China   | Hunan  | < LOD |
| 186 | Dark tea   | Post-fermented | 2021 | Central<br>China   | Hunan  | < LOD |
| 187 | Dark tea   | Post-fermented | 2019 | Central<br>China   | Hunan  | < LOD |
| 188 | Dark tea   | Post-fermented | 2019 | Central<br>China   | Hunan  | < LOD |
| 189 | Dark tea   | Post-fermented | 2019 | Central<br>China   | Hunan  | < LOD |

|     |            |                |      |                    |           |       |
|-----|------------|----------------|------|--------------------|-----------|-------|
| 190 | Dark tea   | Post-fermented | 2019 | Central<br>China   | Hunan     | < LOD |
| 191 | Dark tea   | Post-fermented | 2018 | Central<br>China   | Hunan     | < LOD |
| 192 | Pu-erh tea | Post-fermented | 2018 | Southwest<br>China | Yunnan    | < LOD |
| 193 | Dark tea   | Post-fermented | 2018 | Central<br>China   | Hunan     | < LOD |
| 194 | Pu-erh tea | Post-fermented | 2018 | Southwest<br>China | Yunnan    | < LOD |
| 195 | Dark tea   | Post-fermented | 2018 | Central<br>China   | Hunan     | < LOD |
| 196 | Pu-erh tea | Post-fermented | 2018 | Southwest<br>China | Yunnan    | < LOD |
| 197 | Dark tea   | Post-fermented | 2017 | Central<br>China   | Hunan     | < LOD |
| 198 | Dark tea   | Post-fermented | 2017 | Central<br>China   | Hunan     | < LOD |
| 199 | Pu-erh tea | Post-fermented | 2017 | Central<br>China   | Hunan     | < LOD |
| 200 | Dark tea   | Post-fermented | 2017 | Central<br>China   | Hunan     | < LOD |
| 201 | Dark tea   | Post-fermented | 2017 | Central<br>China   | Hunan     | < LOD |
| 202 | Pu-erh tea | Post-fermented | 2016 | Southwest<br>China | Yunnan    | < LOD |
| 203 | Dark tea   | Post-fermented | 2016 | Central<br>China   | Hunan     | < LOD |
| 204 | Pu-erh tea | Post-fermented | 2016 | Southwest<br>China | Yunnan    | < LOD |
| 205 | Dark tea   | Post-fermented | 2016 | Central<br>China   | Hunan     | < LOD |
| 206 | Dark tea   | Post-fermented | 2015 | Central<br>China   | Hunan     | < LOD |
| 207 | Dark tea   | Post-fermented | 2015 | Central<br>China   | Hunan     | < LOD |
| 208 | Pu-erh tea | Post-fermented | 2014 | Central<br>China   | Hunan     | < LOD |
| 209 | Dark tea   | Post-fermented | 2013 | Central<br>China   | Hunan     | < LOD |
| 210 | Pu-erh tea | Post-fermented | 2020 | East China         | Fujian    | < LOD |
| 211 | Pu-erh tea | Post-fermented | 2020 | East China         | Fujian    | < LOD |
| 212 | Pu-erh tea | Post-fermented | 2019 | South              | Guangdong | < LOD |

|     |            |                |      |                    |        |       |
|-----|------------|----------------|------|--------------------|--------|-------|
|     |            |                |      | China              |        |       |
| 213 | Pu-erh tea | Post-fermented | 2018 | Southwest<br>China | Yunnan | < LOD |
| 214 | Dark tea   | Post-fermented | 2017 | Central<br>China   | Hunan  | < LOD |
| 215 | Dark tea   | Post-fermented | 2012 | Central<br>China   | Hunan  | < LOD |
| 216 | Pu-erh tea | Post-fermented | 2012 | Southwest<br>China | Yunnan | < LOD |
| 217 | Dark tea   | Post-fermented | 2012 | Central<br>China   | Hunan  | < LOD |
| 218 | Dark tea   | Post-fermented | 2010 | Central<br>China   | Hunan  | < LOD |
| 219 | Dark tea   | Post-fermented | 2009 | Central<br>China   | Hunan  | < LOD |

---

*Note:* < LOD, below than limit of detection.

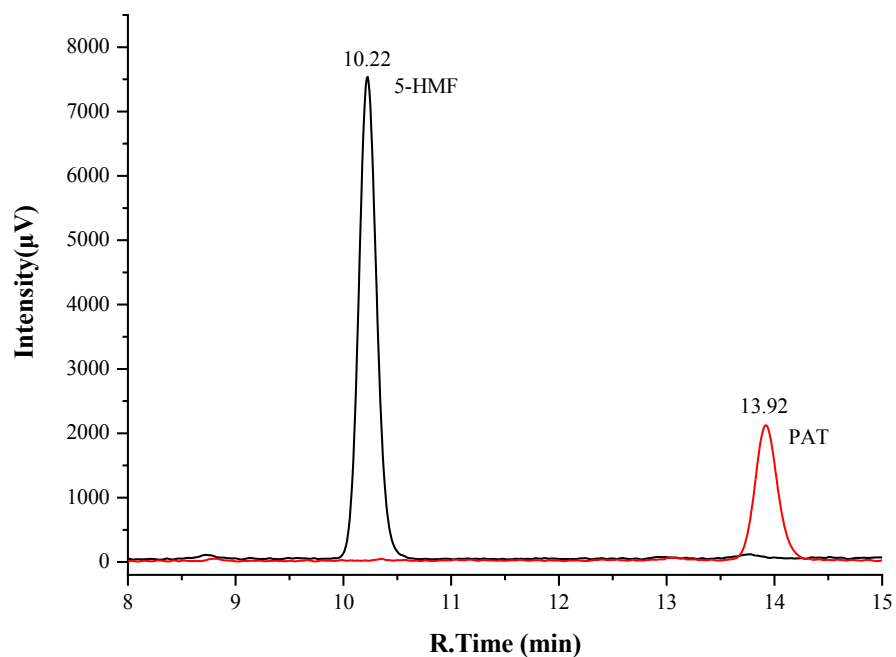

**Figure S1.** Separation of 5-HMF (1000 ng/mL) and PAT (50 ng/mL) on an Atlantis™ T3 column (100 μL injection)

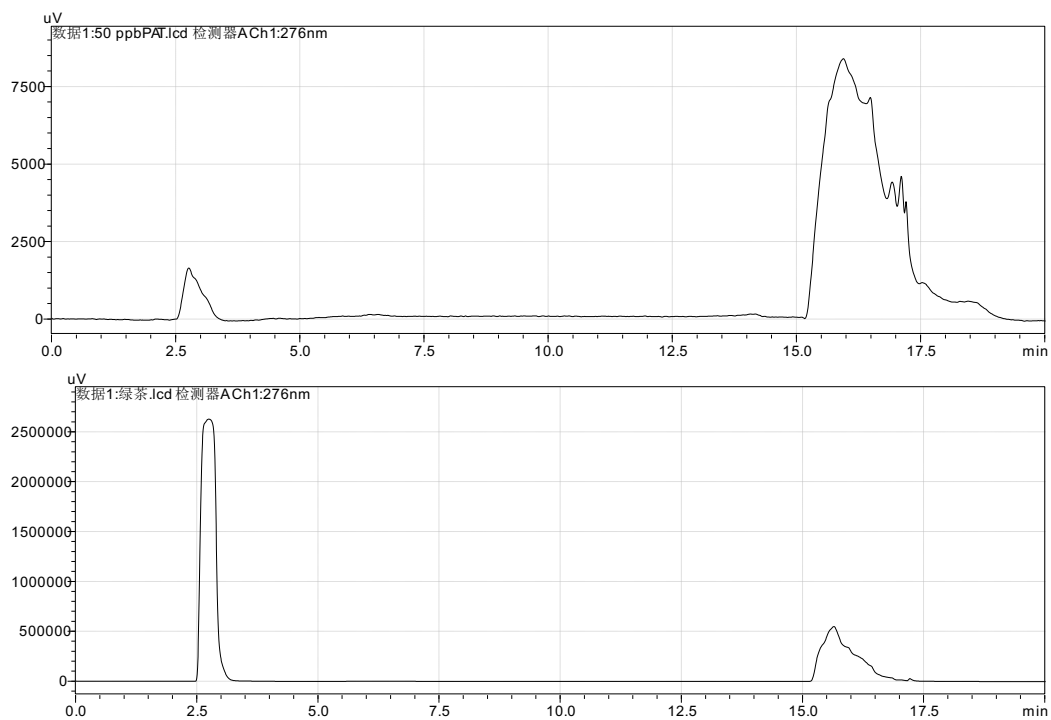

**Figure S2.** HPLC profiles of PAT (50 ng/mL) (upper) and green tea extracts (lower) in pure ACN (100 μL injection)

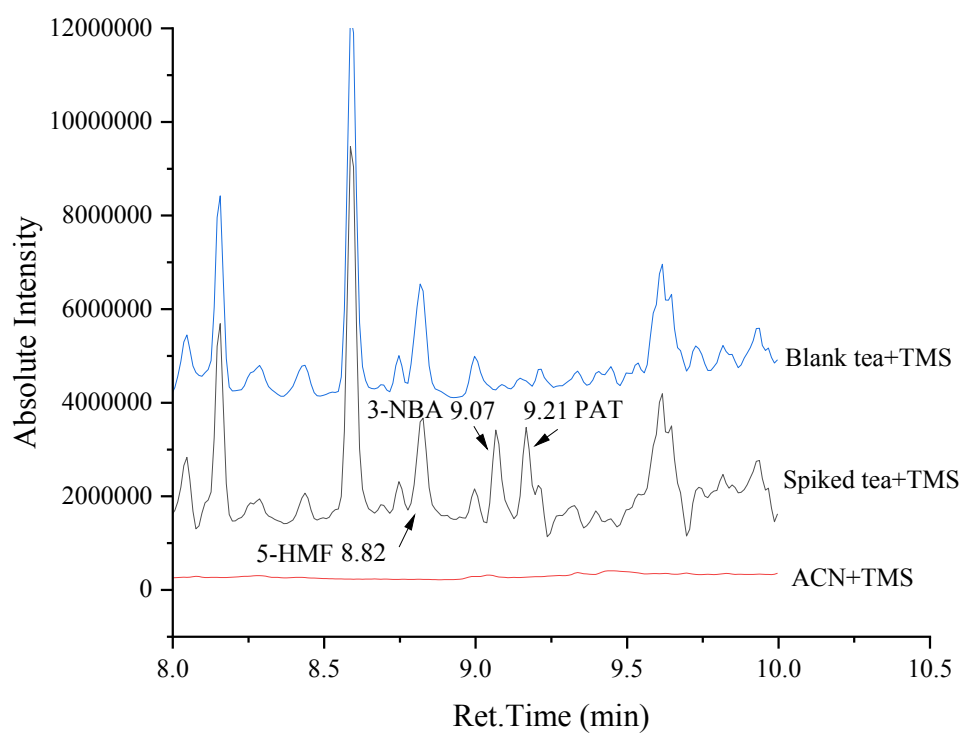

**Figure S3.** Total ion chromatogram of blank black tea spiked with 3-NBA (5.0 ng/g) and PAT (5.0 ng/g).

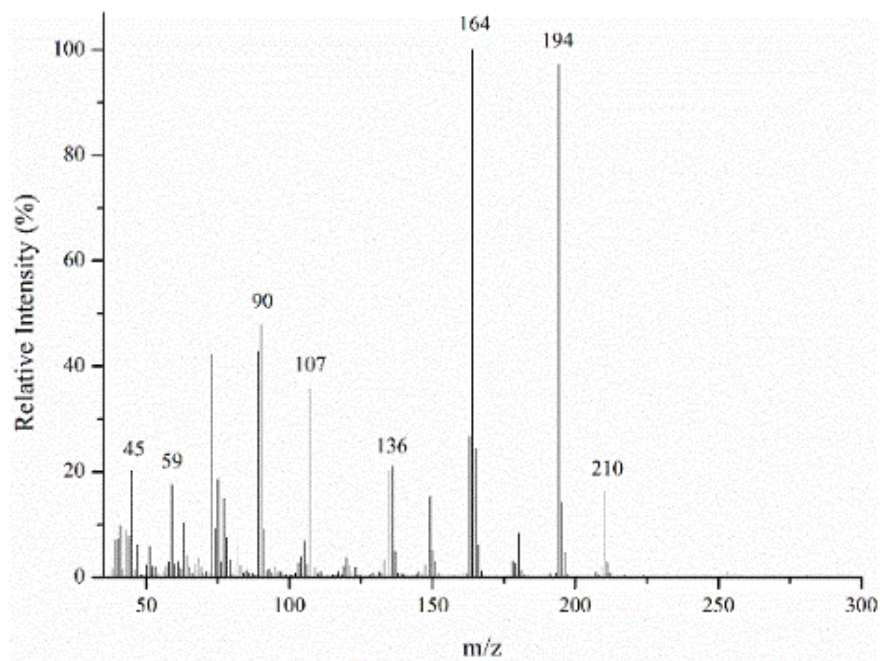

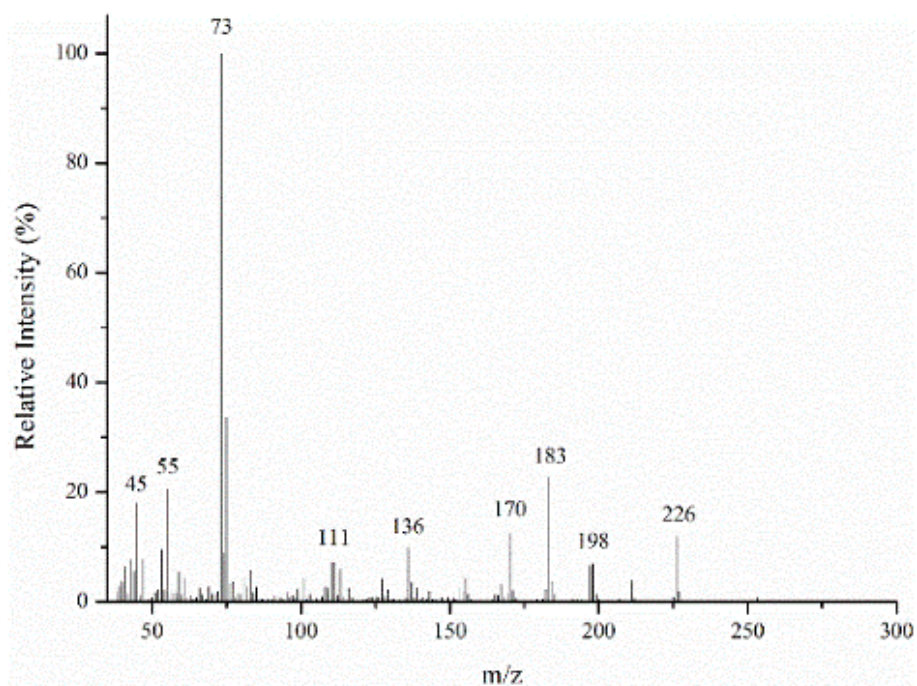

**Figure S4.** Mass spectra of 3-NBA (upper) and PAT (lower) (as TMS derivatives) taken from Fig. S3.

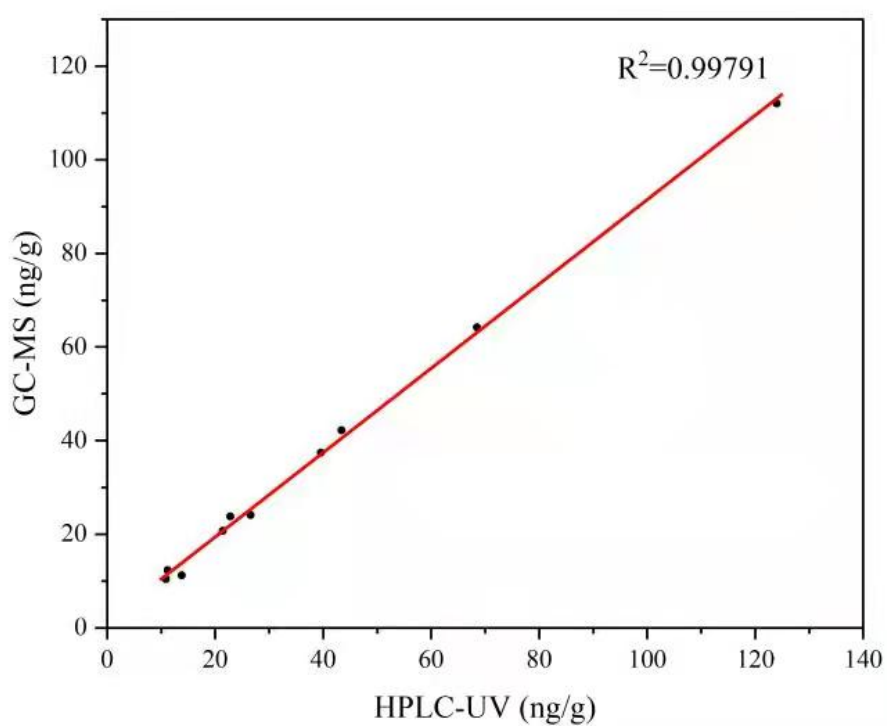

**Figure S5.** Correlation between HPLC-UV and GC-MS results for the 10 tea samples naturally contaminated with PAT and containing > 10 ng/g.
